# Supplementary material for: Hypogonadotropic hypogonadism due to variants in RAB3GAP2: expanding the phenotypic and genotypic spectrum of Martsolf syndrome
Source: PubMed Central journal article supplement — Cold Spring Harb Mol Case Stud. 2020 Jun;6(3):a005033. doi: 10.1101/mcs.a005033 (PMC7304352; doi:10.1101/mcs.a005033), 2020-06
Supplement: supp_mcs.a005033_Supplemental_Tables_1_2.pdf [file supp_mcs.a005033_Supplemental_Tables_1_2.pdf]

**Supplemental Table 1: Genes linked to idiopathic hypogonadotropic hypogonadism\***

|         |        |            |        |
|---------|--------|------------|--------|
| ADRB2   | FLT2   | NROB1      | SIM1   |
| ADRB3   | FSHB   | NROB2      | SIN3A  |
| AGRP    | GHRL   | NR5A1      | SNRPN  |
| ANK1    | GLCE   | NSMF       | SOX10  |
| AR      | GLI3   | NSMF(NELF) | SOX2   |
| ARL6    | GNAS   | NTN1       | SPRY4  |
| AXL     | GNRH1  | OTUD4      | STUB1  |
| BBS1    | GNRHR  | PCSK1      | TAC2   |
| BMP2    | HFE    | PGM2       | TAC3   |
| CARTPT  | HFE2   | PHIP       | TACR3  |
| CCDC141 | HS6ST1 | PNPLA6     | TBCE   |
| CCDC28B | IL17RD | POLR1C     | TCF12  |
| CHD4    | INSR   | POLR3A     | TFR2   |
| CHD7    | KAL1   | POLR3B     | TRIM37 |
| CYP19A1 | KISS1  | POMC       | Trp63  |
| DCAF17  | KISS1R | PPARG      | TSHZ1  |
| DCC     | KL     | PPARGC1B   | TUBB3  |
| DMXL1   | KLB    | PROK2      | TYRO3  |
| DUSP6   | LEP    | PROKR2     | UCP1   |
| ENPP1   | LEPR   | RAB3GAP2   | UCP3   |
| FEZF1   | LHB    | RBM28      | WDR11  |
| FGF17   | LHCGR  | RNF216     | ZIC1   |
| FGF8    | MAGEL2 | SDC3       |        |
| FGFR1   | MC4R   | SEMA3A     |        |
| FLRT3   | NDN    | SEMA3E     |        |

\* List assembled from literature and those reported in Online Mendelian Inheritance in Man database ([www.omim.org](http://www.omim.org))

**Supplemental Table 2: Marsolf syndrome cases with previously reported reproductive phenotypes**

| Cases                                   | Martsolf et al. 1978 <sup>9</sup>                              |                                        | Hennekam et al. 1988 <sup>5</sup>                                                  |                                                           |
|-----------------------------------------|----------------------------------------------------------------|----------------------------------------|------------------------------------------------------------------------------------|-----------------------------------------------------------|
|                                         | Case 1                                                         | Case 2                                 | Case 1                                                                             | Case 2                                                    |
| Sex                                     | Male                                                           | Male                                   | Male                                                                               | Female                                                    |
| Last-reported age (yr)                  | 28 years                                                       | 25 years                               | 12 years                                                                           | 17 years                                                  |
| Consanguinity                           | +                                                              | +                                      | -                                                                                  | -                                                         |
| Genetic Characterization                | -                                                              | -                                      | -                                                                                  | -                                                         |
| Primary DX (Age)                        | Martsolf                                                       | Martsolf                               | Martsolf                                                                           | Martsolf                                                  |
| Initial Treatment                       | Not reported                                                   | Not reported                           | Not reported                                                                       | Not reported                                              |
| Olfaction                               | Not reported                                                   | Not reported                           | Not reported                                                                       | Not reported                                              |
| Birth weight                            | -                                                              | 2800 g                                 | 1980 g                                                                             | 2250 g                                                    |
| Postnatal growth retardation            | +                                                              | +                                      | +                                                                                  | +                                                         |
| Postnatal Microcephaly                  | +                                                              | +                                      | +                                                                                  | +                                                         |
| Developmental delay/ mental retardation | Severe                                                         | Severe                                 | Moderate                                                                           | Moderate                                                  |
| Speech delayed                          | 4 years                                                        | 7 years                                | +                                                                                  | +                                                         |
| Walking delayed                         | 4 years                                                        | 4 years                                | +                                                                                  | +                                                         |
| Seizures                                | -                                                              | -                                      | -                                                                                  | -                                                         |
| Microphthalmia                          | -                                                              | -                                      | -                                                                                  | -                                                         |
| Bilateral congenital Cataracts          | Bilateral lacy lenticular cataracts                            | Bilateral lacy lenticular cataracts    | Bilateral posterior cortical cataracts                                             | Bilateral posterior cortical cataracts                    |
| Optic nerve atrophy                     | -                                                              | -                                      | -                                                                                  | -                                                         |
| Vision                                  | -                                                              | -                                      | Decreased                                                                          | Decreased                                                 |
| Hypotonia                               | -                                                              | -                                      | -                                                                                  | -                                                         |
| Limb spasticity                         | -                                                              | -                                      | +                                                                                  | +                                                         |
| Hypogonadism                            | compensated hypergonadotropism                                 | compensated hypergonadotropism         | Pre-pubertal subject                                                               | Likely Hypogonadotropic Hypogonadism (since <18 years)    |
| Reproductive phenotypes                 | Small testis                                                   | Small testis                           | Bilateral cryptorchidism, micropenis                                               | No menstruation at 17 years                               |
| Other Non-reproductive phenotypes       | Clinodactyly; Large ears                                       | Short metacarpal and phalangeal bones; | Short metacarpal and phalangeal bones; Lax finger joints; Posteriorly rotated ears | Short metacarpal and phalangeal bones; Lax finger joints; |
| Lab investigations                      | FSH 113 pg/dl (N 2.5-6.0 pg/dl), LH 20 pg/dl (N 2.5-6.0 pg/dl) | FSH > 150 pg/dl, LH 31 pg/dl           | FSH < 2.0 mU/ml (N 5.0-50 mU/ml)                                                   | FSH 5.7mU/ml; LH < 2.0 mU/ml                              |
|                                         | T 361-429 ng/dl                                                | T 413-566 ng/dl                        | T 2.9 nmol/l (N 0.7-19nmol/l)                                                      | E2 0.14 nmol/l (N < 0.11 nmol/l)                          |
|                                         |                                                                |                                        | PRL 6.8ng/ml (N 1.0-25.0 ng/ml)                                                    | PRL 6.3 ng/ml                                             |
| Imaging (Brain/Pituitary etc)           | Moderate cerebral atrophy                                      | -                                      | -                                                                                  | MRI normal                                                |

T: Testosterone; LH: Leutinizing hormone; FSH: Follicle stimulating hormone; E2: Estadiol; PRL: prolactin
